# Supplementary material
Source: PubMed Central journal article supplement (PMC5770313)
Supplement: BLT-16-036_Supplementary_content.pdf [file BLT-16-036_Supplementary_content.pdf]

**Table S1** - Characteristics of the 73 randomised controlled trials on the intravenous use of tranexamic acid in major orthopaedic surgery included in the meta-analysis.

| First Author, year <sup>ref.</sup> | Cases (ivTXA/C) | Surgery | ivTXA dose                                                                                            | Controls       | Thromboprophylaxis (duration)                            | VTE                                                   | VTE screening method (follow-up period)      | Other TXA-related SAE |
|------------------------------------|-----------------|---------|-------------------------------------------------------------------------------------------------------|----------------|----------------------------------------------------------|-------------------------------------------------------|----------------------------------------------|-----------------------|
| Benoni, 1996 <sup>16</sup>         | 43/43           | TKA     | 43 pts: 10 mg/kg intra and post                                                                       | 43 pts: saline | Dalteparin/enoxaparin (7-10 post days)                   | ivTXA: 3/43 (7%, 3 DVT)<br>C: 5/43 (12%, 4 DVT, 1 PE) | None                                         | 0/43                  |
| Hippala, 1997 <sup>17</sup>        | 39/38           | TKA     | 39 pts: 15 mg/kg intra + 10 mg/kg (two doses) post                                                    | 38 pts: saline | Enoxaparin 40 mg/day SC (NR)                             | ivTXA: 2/39 (5%, 2 DVT)<br>C: 3/38 (8%, 2 DVT, 1 PE)  | Clinical exam (hospital stay)                | 0/39                  |
| Jansen, 1999 <sup>18</sup>         | 21/21           | TKA     | 21 pts: 15 mg/kg intra and repeated every 8 h for 3 days                                              | 21 pts: saline | Fraxiparin (until discharge)                             | ivTXA: 0/21<br>C: 2/21 (9.5%, 2 DVT)                  | Clinical exam, D-dimer/ FDP (8-24-72 h post) | 0/21                  |
| Eckback, 2000 <sup>19</sup>        | 20/20           | THA     | 20 pts: 10 mg/kg pre and intra + 1 mg/kg/h for 10 h post                                              | 20 pts:        | Dalteparin (10 post days)                                | ivTXA: 1/20 (5%, 1 DVT)<br>C: 1/20 (5%, 1 DVT)        | US (3-21 post days)                          | NR                    |
| Engel, 2001 <sup>29</sup>          | 12/12           | TKA     | 12 pts: 15 mg/kg intra + 10 mg/kg post                                                                | 12 pts: none   | Certoparin 3,000 IU/day SC (until discharge or mobility) | ivTXA 2/12 (17%, 2 DVT)<br>C: 0/12                    | Clinical exam (hospital stay)                | 0/12                  |
| Ellis, 2001 <sup>21</sup>          | 10/10           | TKA     | 10 pts: 15 mg/kg intra + 10 mg/kg/h for 12 h post                                                     | 10 pts: saline | Enoxaparin 40 mg/day SC (35 days)                        | ivTXA: 0/10<br>C: 0/10                                | D-dimer intra                                | 0/10                  |
| Tanaka, 2001 <sup>22</sup>         | 73/26           | TKA     | 24 pts: 20 mg/kg pre<br>22 pts: 20 mg/kg intra<br>27 pts: 10 mg/kg pre and intra                      | 26 pts: saline | NR                                                       | ivTXA: 0/73<br>C: 0/26                                | Venography + PLS (7-14 post days)            | 0/73                  |
| Benoni, 2001 <sup>23</sup>         | 18/20           | THA     | 18 pts: 10 mg/kg pre                                                                                  | 20 pts: saline | Enoxaparin 40 mg/day SC (7-10 post days)                 | ivTXA: 1/18 (6%, 1 PE)<br>C: 1/20 (5%, 1 PE)          | Clinical exam (6 post weeks)                 | 0/18                  |
| Veien, 2002 <sup>24</sup>          | 15/15           | TKA     | 15 pts: 10 mg/kg intra and post                                                                       | 15 pts: saline | Dalteparin 5,000 IU/day SC (until discharge or mobility) | ivTXA: 0/15<br>C: 0/15                                | Clinical exam (hospital stay)                | 0/15                  |
| Good, 2003 <sup>25</sup>           | 27/24           | TKA     | 27 pts: 10 mg/kg intra and post                                                                       | 24 pts: saline | Dalteparin 500 IU/day SC (10 post days)                  | ivTXA: 2/27 (7%, 2 DVT)<br>C: 2/24 (8%, 2 DVT)        | Clinical exam (NR)                           | 0/27                  |
| Husted, 2003 <sup>26</sup>         | 20/20           | THA     | 20 pts: 10 mg/kg pre + 1 mg/kg/h for 10 h                                                             | 20 pts: saline | LMWH (until discharge)                                   | ivTXA: 0/20<br>C: 0/20                                | Clinical exam (3 months)                     | NR                    |
| Zohar, 2004 <sup>27</sup>          | 40/20           | TKA     | 20 pts: 15 mg/kg intra + 10 mg/kg/h for 12 h post<br>20 pts: 15 mg/kg intra + 10 mg/kg/h for 2 h post | 20 pts: none   | Enoxaparin 40 mg/day SC (until discharge)                | ivTXA: 0/40<br>C: 0/20                                | Clinical exam (3 months) + DUS on 5 post day | 0/40                  |
| Garneti, 2004 <sup>28</sup>        | 25/25           | THA     | 25 pts: 10 mg/kg pre                                                                                  | 25 pts: saline | Stockings + foot pumps (post period)                     | ivTXA: 1/25 (4%, 1 PE)<br>C: 0/25                     | Duple x venogram (5 post day)                | NR                    |
| Yamasaki, 2004 <sup>29</sup>       | 20/20           | THA     | 20 pts: 1 g pre                                                                                       | 20 pts: none   | None                                                     | ivTXA: 0/20<br>C: 0/20                                | Clinical exam (4 post weeks)                 | NR                    |
| Lemay, 2004 <sup>30</sup>          | 20/19           | THA     | 20 pts: 10 mg/kg pre + 1 mg/kg/h until wound closure                                                  | 10 pts: saline | Dalteparin 5,000 IU/day SC (NR)                          | ivTXA: 0/20<br>C: 0/19                                | Clinical exam + US (5-7 post days)           | NR                    |
| Niskanen, 2005 <sup>31</sup>       | 19/20           | THA     | 19 pts: 10 mg/kg pre and 10 mg/kg (two doses) post                                                    | 20 pts: saline | Dalteparin (hospital stay)                               | ivTXA: 0/19<br>C: 0/20                                | Clinical exam (NR)                           | 0/19                  |

continued on next page

**Table S1** – Characteristics of the 73 randomised controlled trials on the intravenous use of tranexamic acid in major orthopaedic surgery included in the meta-analysis. *Continued from previous page*

| First Author, year <sup>ref.</sup>  | Cases (ivTXA/C) | Surgery | ivTXA dose                                                                                                                         | Controls        | Thromboprophylaxis (duration)                        | VTE                                            | VTE screening method (follow-up period)       | Other TXA-related SAE |
|-------------------------------------|-----------------|---------|------------------------------------------------------------------------------------------------------------------------------------|-----------------|------------------------------------------------------|------------------------------------------------|-----------------------------------------------|-----------------------|
| Johansson, 2005 <sup>32</sup>       | 47/53           | THA     | 47 pts: 15 mg/kg pre                                                                                                               | 53 pts: saline  | Dalteparin 5,000 IU/day SC (until mobilization)      | ivTXA: 0/47<br>C: 0/53                         | Clinical exam (6 post weeks)                  | NR                    |
| Open, 2006 <sup>33</sup>            | 15/14           | TKA     | 15 pts: 15 mg/kg intra                                                                                                             | 14 pts: saline  | Dalteparin (until discharge)                         | ivTXA: 0/15<br>C: 0/14                         | US (5 post day)                               | 0/15                  |
| Camarasa, 2006 <sup>34</sup>        | 35/60           | TKA     | 35 pts: 10 mg/kg intra and post                                                                                                    | 60 pts: saline  | Dalteparin 5,000 IU/day SC (40 days)                 | ivTXA: 0/35<br>C: 0/60                         | Clinical exam (3 months)                      | 0/35                  |
| Molloy, 2007 <sup>35</sup>          | 50/50           | TKA     | 50 pts: 500 mg intra and post                                                                                                      | 50 pts: none    | ASA 150 mg/day (6 weeks)                             | ivTXA: 0/50<br>C: 0/50                         | Clinical exam (NR)                            | 0/50                  |
| Sadeghi, 2007 <sup>36</sup>         | 32/35           | HFS     | 32 pts: 15 mg/kg pre                                                                                                               | 35 pts: saline  | NR                                                   | ivTXA: 0/32<br>C: 0/35                         | Clinical exam (6 post weeks)                  | NR                    |
| Claeys, 2007 <sup>37</sup>          | 20/20           | THA     | 20 pts: 15 mg/kg intra                                                                                                             | 20 pts: saline  | Fraxiparine (10 post days)                           | ivTXA: 3/17 (18%, 3 DVT)<br>C: 0/18            | Clinical exam, US (10 post day)               | NR                    |
| Alvarez, 2008 <sup>38</sup>         | 46/49           | TKA     | 46 pts: 10 mg/kg intra + 10 mg/kg/h for 3 h post                                                                                   | 49 pts: saline  | Bemiparin 3500 IU/day SC (3-4 weeks after discharge) | ivTXA: 0/46<br>C: 0/49                         | Clinical exam (3 months)                      | 0/46                  |
| Kakar, 2009 <sup>39</sup>           | 25/25           | TKA     | 25 pts: 10 mg/kg intra + 1 mg/kg/h until wound closure                                                                             | 25 pts: saline  | NR                                                   | ivTXA: 0/25<br>C: 0/25                         | Clinical exam (7 post day)                    | 0/25                  |
| Zulferey, 2010 <sup>40</sup>        | 57/53           | HFS     | 57 pts: 15 mg/kg pre and post                                                                                                      | 53 pts: saline  | Fondaparinux 2.5 mg/day (35 days)                    | ivTXA: 5/57 (9%, 5 DVT)<br>C: 3/53 (6%, 3 DVT) | Clinical exam (6 post weeks), US (7 post day) | 3/57 (5%, 3 ACS)      |
| Kazemi, 2010 <sup>41</sup>          | 32/32           | THA     | 32 pts: 15 mg/kg pre                                                                                                               | 32 pts: saline  | Enoxaparin 40 mg/day SC (10 post days)               | ivTXA: 0/32<br>C: 1/32 (3%)                    | Clinical exam (NR)                            | NR                    |
| MacGillivray, 2011 <sup>42</sup>    | 40/20           | TKA     | 20 pts: 10 mg/kg intra and post<br>20 pts: 15 mg/kg intra and post                                                                 | 20 pts: saline  | Warfarin (INR 2.5-5) (NR)                            | ivTXA: 2/40 (5%, 2 PE)<br>C: 0/20              | Clinical exam (hospital stay)                 | 0/40                  |
| Charochohvanich, 2011 <sup>43</sup> | 50/50           | TKA     | 50 pts: 10 mg/kg intra and post                                                                                                    | 50 pts: saline  | None                                                 | ivTXA: 0/50<br>C: 0/50                         | Clinical exam (3 months)                      | 0/50                  |
| Malhotra, 2011 <sup>44</sup>        | 25/25           | THA     | 25 pts: 15 mg/kg pre                                                                                                               | 25 pts: saline  | LMWH (hospital stay)                                 | ivTXA: 0/25<br>C: 0/25                         | D-dimer (pre and 24 h post), US (10 post day) | NR                    |
| McConnell, 2012 <sup>45</sup>       | 22/22           | TKA     | 22 pts: 10 mg/kg pre                                                                                                               | 22 pts: saline  | ASA 150 mg/day os (35 days)                          | ivTXA: 0/22<br>C: 0/22                         | NR                                            | 0/22                  |
| Charochohvanich, 2012 <sup>46</sup> | 120/120         | TKA     | 120 pts: 10 mg/kg intra and post                                                                                                   | 120 pts: saline | MAP                                                  | ivTXA: 0/120<br>C: 0/120                       | Clinical exam (hospital stay)                 | 0/120                 |
| Maniar, 2012 <sup>47</sup>          | 160/40          | TKA     | 40 pts: 10 mg/kg intra<br>40 pts: 10 mg/kg intra and post<br>40 pts: 10 m/kg pre and intra<br>40 pts: 10 mg/kg pre, intra and post | 40 pts: none    | LMWH (until discharge)                               | ivTXA: 0/160<br>C: 0/40                        | Clinical exam (3 months)                      | 0/160                 |

*continued on next page*

**Table S1** - Characteristics of the 73 randomised controlled trials on the intravenous use of tranexamic acid in major orthopaedic surgery included in the meta-analysis.  
Continued from previous page

| First Author, year <sup>ref</sup> | Cases (ivTXA/C) | Surgery | ivTXA dose                                                                                                           | Controls         | Thromboprophylaxis (duration)                                                                    | VTE                                                      | VTE screening method (follow-up period)                             | Other TXA-related SAE |
|-----------------------------------|-----------------|---------|----------------------------------------------------------------------------------------------------------------------|------------------|--------------------------------------------------------------------------------------------------|----------------------------------------------------------|---------------------------------------------------------------------|-----------------------|
| Lin, 2012 <sup>48</sup>           | 101/50          | TKA     | 52 pts: 10 mg/kg intra<br>49 pts: 10 mg/kg pre and intra                                                             | 50 pts: saline   | Enoxaparin 40 mg/day SC (until discharge)                                                        | ivTXA: 1/101 (1%, 1 DVT)<br>C: 0/50                      | Clinical exam (3 months)                                            | 0/101                 |
| Ravitej, 2012 <sup>49</sup>       | 88/87           | BL, TKA | 88 pts: 10 mg/kg intra and 10 mg/kg/h for 3 h intra (second TKA)                                                     | 87 pts: saline   | Enoxaparin 40 mg/day SC (NR)                                                                     | ivTXA: 0/88<br>C: 1/87 (1%, 1 DVT)                       | Clinical exam (post period)                                         | 0/50                  |
| Imai, 2012 <sup>50</sup>          | 95/22           | THA     | 24 pts: 1 g intra<br>20 pts: 1 g intra and post<br>25 pts: 1 g pre<br>26 pts: 1 g pre and post                       | 25 pts: saline   | Enoxaparin 40 mg/day SC (10 post days)                                                           | ivTXA: 11/95 (12%, 10 DVT, 1 PE)<br>C: 3/22 (14%, 3 DVT) | WBCT (7 post day)                                                   | NR                    |
| Gautam, 2013 <sup>51</sup>        | 14/13           | TKA     | 14 pts: 10 mg/kg intra and post                                                                                      | 13 pts: none     | NR                                                                                               | ivTXA: 0/14<br>C: 0/13                                   | Clinical exam (post period), D-dimer (2 post day), DUS (5 post day) | 0/14                  |
| Seo, 2013 <sup>52</sup>           | 50/50           | TKA     | 50 pts: 1.5 g intra                                                                                                  | 50 pts: saline   | NR                                                                                               | ivTXA: 0/50<br>C: 2/50 (4%, 2 DVT)                       | NR                                                                  | 0/50                  |
| Aguilera, 2013 <sup>53</sup>      | 44/43           | TKA     | 44 pts: 1 g (two doses) intra                                                                                        | 43 pts: none     | LMWH (30 post days)                                                                              | ivTXA: 0/44<br>C: 0/43                                   | NR                                                                  | 1/44 (1 TIA)          |
| Vijay, 2013 <sup>54</sup>         | 45/45           | HFS     | 45 pts: 500 mg pre + 1 mg/kg/h during operation                                                                      | 45 pts: saline   | NR                                                                                               | ivTXA: 0/45<br>C: 0/45                                   | Clinical exam (hospital stay)                                       | 0/45                  |
| Lee, 2013 <sup>55</sup>           | 34/34           | THA     | 34 pts: 15 mg/kg pre + 15 mg/kg CI (until wound closure)                                                             | 34 pts: saline   | NR                                                                                               | ivTXA: 0/34<br>C: 0/34                                   | Clinical exam, US (7 post day)                                      | NR                    |
| Kim, 2014 <sup>56</sup>           | 163/163         | TKA     | 90 pts (UL, TKA): 10 mg/kg intra and post<br>73 pts (BL, TKA): 10 mg/kg intra and post + 10 mg/kg intra (second TKA) | 163 pts: none    | Standard risk: enoxaparin 40 mg/day SC (7-10 days)<br>High risk: IPP (7-10 days) + ASA (6 weeks) | ivTXA: 0/163<br>C: 1/163 (0.6%, 1 PE)                    | Clinical exam (NR)                                                  | 0/163                 |
| Huang, 2014 <sup>57</sup>         | 184/0           | TKA     | 92 pts: 3 g intra<br>92 pts: 1.5 g intra                                                                             | -                | LMWH 6000 IU/day SC (until discharge) + rivaroxaban 10 mg/day os (10 post days)                  | ivTXA: 1/184 (0.5%, 1 DVT)                               | DUS (1-3 post days, at discharge, 1-3 months)                       | 0/184                 |
| Patel, 2014 <sup>58</sup>         | 42/47           | TKA     | 42 pts: 10 mg/kg intra                                                                                               | 47 pts: 2 g IATA | LMWH (14 post days)                                                                              | ivTXA: 0/42<br>C: 0/47                                   | Clinical exam (hospital stay)                                       | 0/42                  |
| Soni, 2014 <sup>59</sup>          | 40/40           | TKA     | 40 pts: 10 mg/kg pre, intra and post                                                                                 | 40 pts: 3 g IATA | LMWH (until discharge)                                                                           | ivTXA: 0/40<br>C: 0/40                                   | NR (6 post weeks)                                                   | 0/40                  |
| Sarzaeem, 2014 <sup>60</sup>      | 50/50           | TKA     | 50 pts: 500 mg post                                                                                                  | 50 pts: none     | NR                                                                                               | ivTXA: 0/50<br>C: 0/50                                   | NR                                                                  | 0/50                  |
| Pachauri, 2014 <sup>61</sup>      | 50/49           | TKA     | 50 pts: 1 g pre and post                                                                                             | 49 pts: none     | LMWH (post period)                                                                               | ivTXA: 0/50<br>C: 0/49                                   | NP                                                                  | NR                    |
| Gomez-Barrera, 2014 <sup>62</sup> | 39/39           | TKA     | 39 pts: 15 mg/kg intra and post                                                                                      | 39 pts: IATA 3 g | Enoxaparin 40 mg/day SC (14 post days)                                                           | ivTXA: 0/39<br>C: 1/39 (3%, 1 DVT)                       | Clinical exam (hospital stay)                                       | 0/39                  |

continued on next page

**Table S1** – Characteristics of the 73 randomised controlled trials on the intravenous use of tranexamic acid in major orthopaedic surgery included in the meta-analysis.  
Continued from previous page

| First Author, year <sup>ref</sup> | Cases (ivTXA/C) | Surgery  | ivTXA dose                                                                                                       | Controls        | Thromboprophylaxis (duration)                                                                  | VTE                                                  | VTE screening method (follow-up period)                           | Other TXA-related SAE |
|-----------------------------------|-----------------|----------|------------------------------------------------------------------------------------------------------------------|-----------------|------------------------------------------------------------------------------------------------|------------------------------------------------------|-------------------------------------------------------------------|-----------------------|
| Oremus, 2014 <sup>63</sup>        | 49/49           | TKA, THA | 49 pts: 1 g (two doses) intra                                                                                    | 49 pts: saline  | Enoxaparin 40 mg/day SC (28 post days for TKA, 35 post days for THA)                           | ivTXA: 0/49<br>C: 2/49 (4%, 1 DVT and 1 PE)          | Clinical exam (hospital stay)                                     | NR                    |
| Wei, 2014 <sup>64</sup>           | 101/100         | THA      | 101 pts: 3 g pre                                                                                                 | 100 pts: saline | LMWH (NR)                                                                                      | ivTXA: 1/101 (1%, 1 DVT)<br>C: 0/100                 | Clinical exam (3 months), US (discharge)                          | NR                    |
| Emara, 2014 <sup>65</sup>         | 20/20           | HFS      | 20 pts: 10 mg/kg pre + 5 mg/kg/h during operation                                                                | 20 pts: saline  | Enoxaparin (NR)                                                                                | ivTXA: 5/20 (25%, 5 DVT)<br>C: 1/20 (5%, 1 DVT)      | Clinical exam (4 post weeks)                                      | 1/20 (5%, 1 CVS)      |
| Shinde, 2015 <sup>66</sup>        | 28/28           | TKA      | 28 pts: 10 mg/kg intra + 10 mg/kg (two doses) post                                                               | 28 pts: saline  | Dalteparin 5,000 IU/day SC (5 days) or rivaroxaban 10 mg/day os (10 days) + MAP                | ivTXA: 3/28 (11%, 3 DVT)<br>C: 2/28 (7%, 2 DVT)      | Clinical exam (hospital stay), DUS (5 post day)                   | 0/28                  |
| Lin, 2015 <sup>67</sup>           | 40/40           | TKA      | 40 pts: 1 g pre                                                                                                  | 40 pts: saline  | Rivaroxaban 10 mg/day os (14 post days)                                                        | ivTXA: 0/40<br>C: 0/40                               | Clinical exam (3 months)                                          | 0/40                  |
| Karaaslan, 2015 <sup>68</sup>     | 41/40           | BL, TKA  | 41 pts: 15 mg/kg intra + 10 mg/kg/h for 3 h post (second TKA)                                                    | 40 pts: none    | Enoxaparin 40 mg/day (NR)                                                                      | ivTXA: 1/41 (2%, 1 DVT)<br>C: 0/40                   | Clinical exam (hospital stay), DUS (7-14 post days)               | 0/41                  |
| Aguilera, 2015 <sup>69</sup>      | 50/50           | TKA      | 50 pts: 1 g (two doses) intra                                                                                    | 50 pts: none    | LMWH (30 post days)                                                                            | ivTXA: 0/50<br>C: 0/50                               | Clinical exam (2 months)                                          | 0/50                  |
| Shen, 2015 <sup>70</sup>          | 41/40           | TKA      | 41 pts: 15 mg/kg intra                                                                                           | 40 pts: saline  | LMWH (NR)                                                                                      | ivTXA: 4/41 (10%, 4 DVT)<br>C: 4/40 (10%, 4 DVT)     | Clinical exam, DUS (1-2-4-12 post weeks)                          | 0/41                  |
| Hsu, 2015 <sup>71</sup>           | 30/30           | THA      | 30 pts: 1 g pre and post                                                                                         | 30 pts: saline  | Enoxaparin 40 mg/day SC (until discharge)                                                      | ivTXA: 0/30<br>C: 0/30                               | Clinical exam (two weeks, 1-2 months)                             | 0/30                  |
| Mohib, 2015 <sup>72</sup>         | 50/50           | HFS      | 50 pts: 15 mg/kg pre and post                                                                                    | 50 pts: saline  | Enoxaparin 40 mg/day SC (NR)                                                                   | ivTXA: 0/50<br>C: 0/50                               | NR                                                                | NR                    |
| Nielsen, 2016 <sup>73</sup>       | 60/0            | TKA      | 60 pts: 1 g pre                                                                                                  | -               | Rivaroxaban 10 mg/day os (until discharge)                                                     | ivTXA: 0/60                                          | Clinical exam (3 months)                                          | 0/60                  |
| Drosos, 2016 <sup>74</sup>        | 30/30           | TKA      | 30 pts: 1 g intra                                                                                                | 30 pts: none    | NR                                                                                             | ivTXA: 0/30<br>C: 0/30                               | Clinical exam (30 days)                                           | 0/30                  |
| Chen, 2016 <sup>75</sup>          | 60/60           | BL, TKA  | 60 pts: 10 mg/kg intra (first TKA)                                                                               | 60 pts: saline  | Rivaroxaban 10 mg/day (14 post days)                                                           | ivTXA: 10/60 (17%, 10 CMVT)<br>C: 9/60 (15%, 9 CMVT) | Clinical exam (6 post weeks), DUS (discharge and on 6 post weeks) | 0/60                  |
| Xie, 2016 <sup>76</sup>           | 151/0           | TKA      | 50 pts: 20 mg/kg pre<br>50 pts: 20 mg/kg pre + 10 mg/kg post<br>51 pts: 20 mg/kg pre + 10 mg/kg (two doses) post | -               | IPP + enoxaparin 2,000 IU/day SC (until discharge) and rivaroxaban 10 mg/day os (10 post days) | ivTXA: 0/151                                         | Clinical exam, DUS (at discharge and at 1 month follow-up)        | 0/151                 |

continued on next page

**Table S1** - Characteristics of the 73 randomised controlled trials on the intravenous use of tranexamic acid in major orthopaedic surgery included in the meta-analysis.  
Continued from previous page

| First Author, year <sup>ref</sup> | Cases (ivTXA/C) | Surgery | ivTXA dose                                                                                                                                                  | Controls                     | Thromboprophylaxis (duration)                                                                  | VTE                                                   | VTE screening method (follow-up period)                                       | Other TXA-related SAE |
|-----------------------------------|-----------------|---------|-------------------------------------------------------------------------------------------------------------------------------------------------------------|------------------------------|------------------------------------------------------------------------------------------------|-------------------------------------------------------|-------------------------------------------------------------------------------|-----------------------|
| Tzatzairis, 2016 <sup>77</sup>    | 40/40           | TKA     | 40 pts: 1 g pre                                                                                                                                             | 40 pts: none                 | LMWH (NR)                                                                                      | ivTXA: 0/40<br>C: 0/40                                | Clinical exam (6 post weeks)                                                  | 0/40                  |
| Jain, 2016 <sup>78</sup>          | 119/0           | TKA     | 119 pts: 15 mg/kg pre + 10 mg/kg (two doses) post                                                                                                           | -                            | ASA 75 mg/day (6 weeks)                                                                        | ivTXA: 0/119                                          | Clinical exam (NR)                                                            | 0/119                 |
| Xie, 2016 <sup>79</sup>           | 140/70          | THA     | 70 pts: 1.5 g pre<br>70 pts: 1 g pre                                                                                                                        | 70 pts: 2 g IATA             | IPP + enoxaparin 4,000 IU/day SC (until discharge) + rivaroxaban 10 mg/day os (30 days)        | ivTXA: 3/140 (2%, 3 DVT)<br>C: 0/70                   | Clinical exam (hospital stay), DUS (at discharge and at 1-3 months follow-up) | 0/140                 |
| Wu, 2016 <sup>80</sup>            | 84/0            | THA     | 84 pts: 15 mg/kg pre                                                                                                                                        | -                            | IPP + LMWH 4,000 IU/day SC (until discharge) + rivaroxaban 10 mg/day os (30 days)              | ivTXA: 8/84 (9.5%, 1 DVT, 7 CMVT)                     | Clinical exam (3 months), DUS (5 post day)                                    | 0/84                  |
| Tengberg, 2016 <sup>81</sup>      | 33/39           | HFS     | 33 pts: 1 g pre + 3 g post (24-h infusion)                                                                                                                  | 39 pts: saline               | Dalteparin 5,000 IU/day SC (NR)                                                                | ivTXA: 0/33<br>C: 1/39 (3%, 1 DVT)                    | Clinical exam (3 months)                                                      | 0/33                  |
| Yi, 2016 <sup>82</sup>            | 100/50          | THA     | 100 pts: 15 mg/kg pre                                                                                                                                       | 50 pts: saline               | Enoxaparin 2,000 IU/day SC (until discharge) + rivaroxaban 10 mg/day os (15 days)              | ivTXA: 4/100 (4%, 4 DVT)<br>C: 0/50                   | Clinical exam (3 months), DUS (3 post day)                                    | NR                    |
| Zhang, 2016 <sup>83</sup>         | 25/25           | THA     | 25 pts: 1 g pre                                                                                                                                             | 25 pts: none                 | LMWH 4,100 IU (2 post weeks)                                                                   | ivTXA: 1/25 (4%, 1 DVT)<br>C: 0/25                    | Clinical exam (1 month), DUS (7 post day)                                     | 0/25                  |
| Maniar, 2017 <sup>84</sup>        | 50/25           | BL, TKA | 25 pts: 10 mg/kg (two doses) intra<br>25 pts: 10 mg/kg pre + 10 mg/kg (two doses) post                                                                      | 25 pts: 3 g IATA (two doses) | Enoxaparin 40 mg/day SC (until discharge)                                                      | ivTXA: 0/50<br>C: 0/25                                | Clinical exam (3 months)                                                      | 0/50                  |
| Lee, 2017 <sup>85</sup>           | 283/93          | TKA     | 283 pts: 10 mg/kg intra and post                                                                                                                            | 93 pts: 2 g IATA             | IPP and/or rivaroxaban/ASA according to the risk (5 weeks)                                     | ivTXA: 1/283 (0.3%, 1 PE)<br>C: 0/93                  | Clinical exam (NR)                                                            | 0/283                 |
| Lei, 2017 <sup>86</sup>           | 159/0           | TKA     | 53 pts: 20 mg/kg pre + 10 mg/kg (two doses) post<br>49 pts: 20 mg/kg pre + 10 mg/kg (three doses) post<br>57 pts: 20 mg/kg pre + 10 mg/kg (four doses) post | -                            | IPP + enoxaparin 2,000 IU/day SC (until discharge) and rivaroxaban 10 mg/day os (10 post days) | ivTXA: 0/159                                          | Clinical exam (hospital stay), DUS (at discharge and on 2 post weeks)         | 0/159                 |
| Wang, 2017 <sup>87</sup>          | 100/98          | TKA     | 100 pts: 1 g TXA intra                                                                                                                                      | 98 pts: saline               | Rivaroxaban 10 mg/day os (14 post days)                                                        | ivTXA: 10/100 (10%, 10 DVT)<br>C: 10/98 (10%, 10 DVT) | Clinical exam (3 months), venography (16 post days)                           | 0/100                 |
| Vera, 2017 <sup>88</sup>          | 53/49           | TSA     | 53 pts: 10 mg/kg pre and intra                                                                                                                              | 49 pts: saline               | UFH 5,000 IU/day SC (until discharge) and ASA 325 mg/da (2 post weeks)                         | ivTXA: 0/53<br>C: 0/49                                | Clinical exam (6 post weeks)                                                  | 0/53                  |

ivTXA: intravenous tranexamic acid; IATA: intra-articular tranexamic acid; C: controls; h: hour; SAE: severe adverse events; TKA: total knee arthroplasty; THA: total hip arthroplasty; pre: preoperative; intra: intraoperative; post: postoperative; pts: patients; INR: international normalised ratio; VTE: venous thromboembolism; PE: pulmonary embolism; DVT: deep vein thrombosis; LMWH: low molecular weight heparin; NR: not reported; PLS: perfusion lung scan; US: ultrasound; DUS: doppler ultrasound; SC: subcutaneously; ASA: acetyl salicylic acid; UL: unilateral; BL: bilateral; IPP: intermittent pneumatic pump; MAP: mechanical ankle pumping; NP: not performed; TIA: transient ischaemic attack; HFS: hip fracture surgery; CMVT: calf muscle vein thrombosis; ACS: acute coronary syndrome; CVSS: cerebrovascular stroke; CI: continuous infusion; WBCT: whole body computed tomography; TSA: total shoulder arthroplasty; UFH: unfractionated heparin.
